# Supplementary material
Source: PubMed Central journal article supplement (PMC522026)

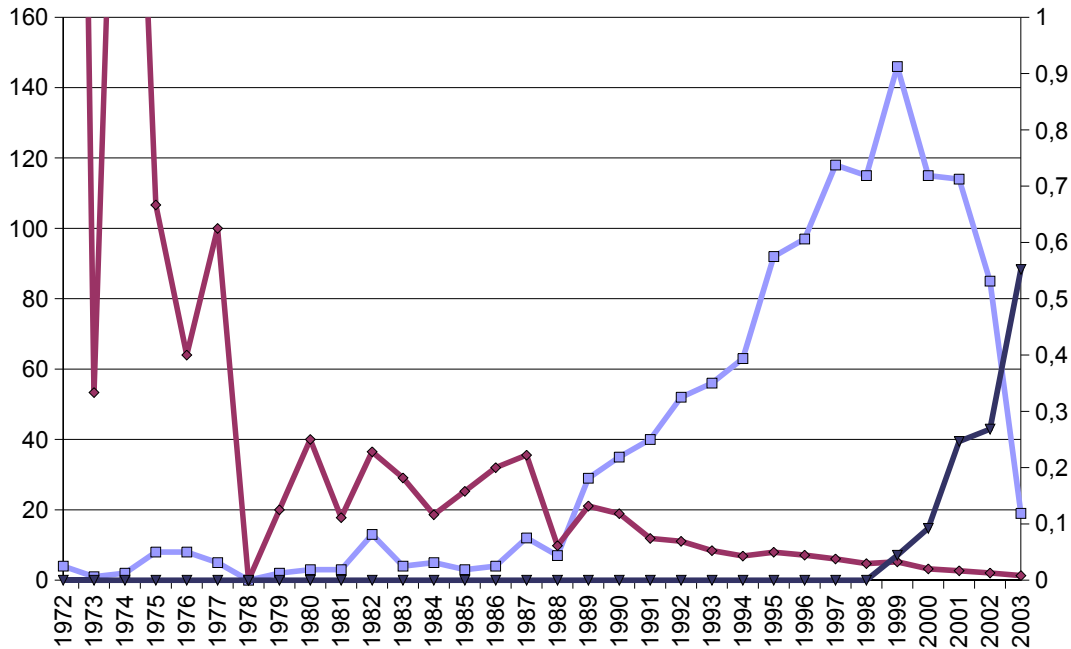

Supplement: pnas_101_41_14754__1.pdf [file pnas_101_41_14754__1.pdf]

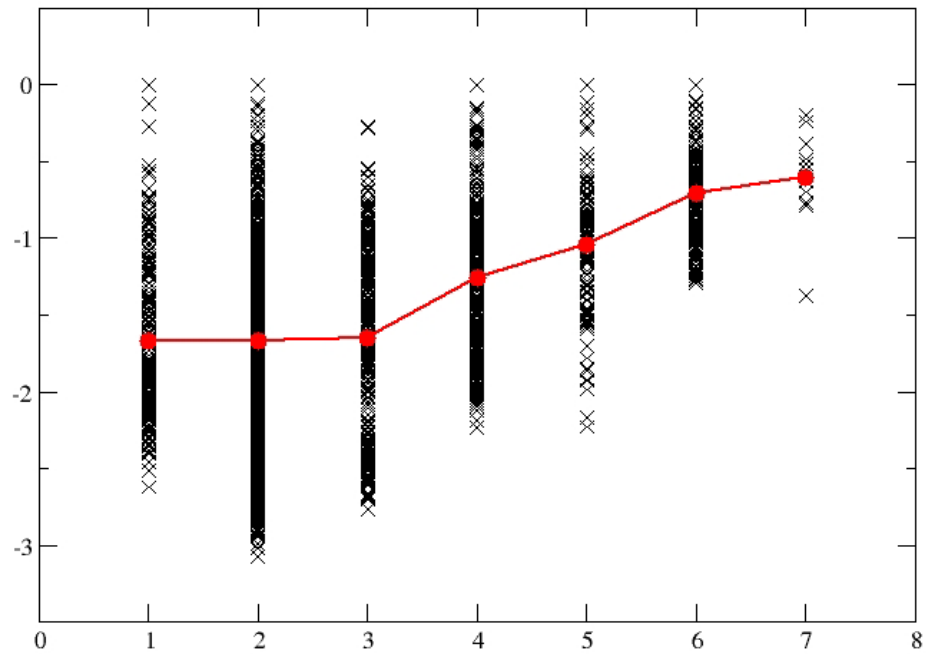

Supplement: pnas_101_41_14754__2.pdf [file pnas_101_41_14754__2.pdf]

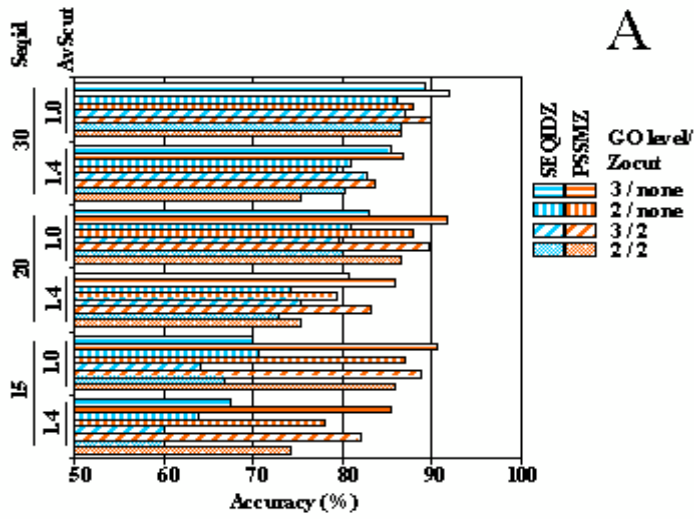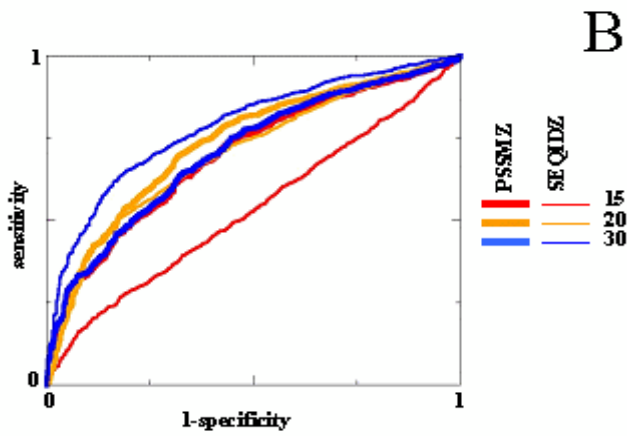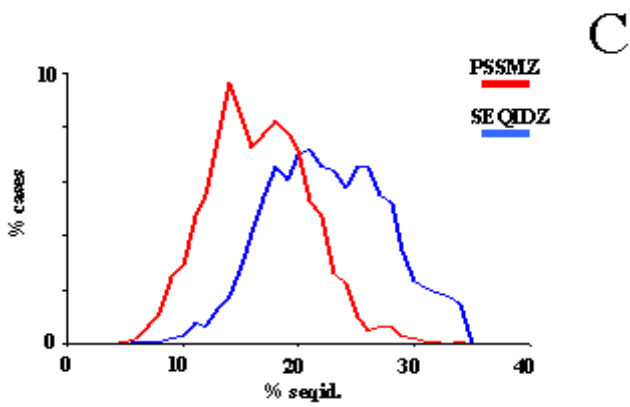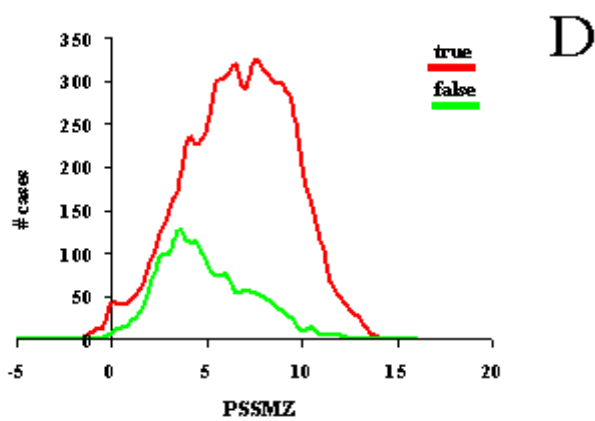

Supplement: pnas_101_41_14754__3.pdf [file pnas_101_41_14754__3.pdf]

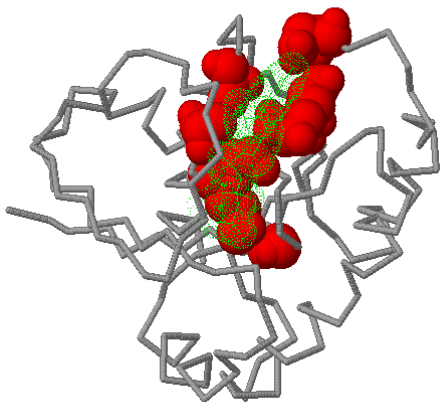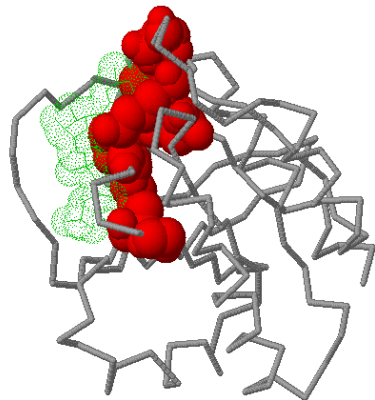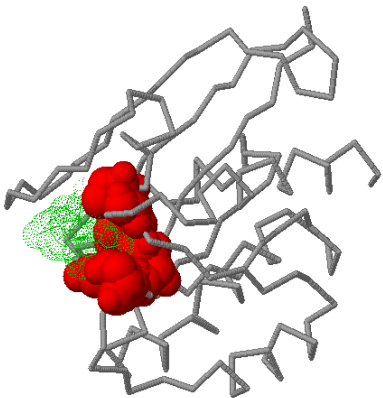

Supplement: pnas_101_41_14754__4.pdf [file pnas_101_41_14754__4.pdf]
